# Supplementary material for: Structural, spectroscopic and functional investigation into Fe-substituted MnSOD from human pathogen Clostridium difficile
Source: Royal Society of Chemistry journal article supplement (doi:10.1039/c4mt00090k), 2014-01-01
Supplement: c4mt00090k1.pdf [file c4mt00090k1.pdf]

**Electronic Supporting information**  
**Of**  
**Structural, Spectroscopic and Functional Investigation into**  
**Fe-substituted MnSOD from Human Pathogen *Clostridium difficile***

*Wei Li<sup>1</sup>, Hongfei Wang<sup>2</sup>, Qingli Wang<sup>3</sup> and Xiangshi Tan<sup>1\*</sup>*

<sup>1</sup>Department of Chemistry & Institutes of Biomedical Sciences, Fudan University,  
Shanghai 200433, China.

<sup>2</sup> Institute of Molecular Science, Shanxi University,  
Taiyuan 030006, China

<sup>3</sup>College of Chemistry, Chemical Engineering and Materials Science, Shandong  
Normal University, Jinan 250014, China

\*To whom correspondence should be addressed. Email: [xstan@fudan.edu.cn](mailto:xstan@fudan.edu.cn)

Phone: +86 -21-55664475. Fax: + 86-21-65641740

## 1. The EPR spectra of MnSOD<sub>cd</sub>

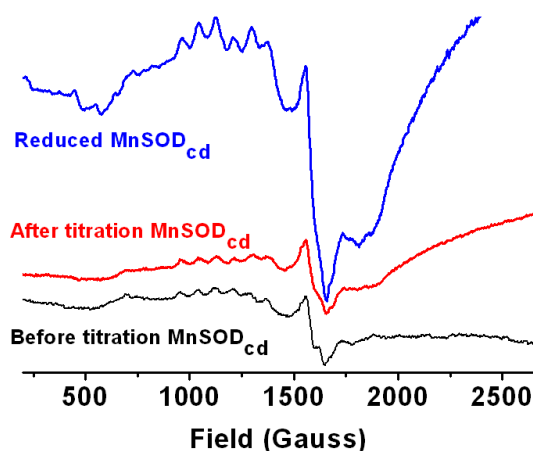

**Figure S1. The EPR spectra of MnSOD<sub>cd</sub> before and after UV/Vis pH titrations.**

The Mn<sup>3+</sup> center is EPR silent and the Mn<sup>2+</sup> center exhibits a EPR spectrum characterized by six transitions at ~1000 G, which is due to the hyperfine structure arose from the magnetic interaction of the electron spin ( $S=5/2$ ) on Mn<sup>2+</sup> and the nuclear spin ( $I=5/2$ ) of <sup>55</sup>Mn. The fully reduced Mn<sup>2+</sup>SOD<sub>cd</sub> were obtained by H<sub>2</sub>O<sub>2</sub> reduction before EPR spectrum collection. The relative low intensity at ~1000 G in the EPR spectrum of the isolated MnSOD<sub>cd</sub> (before titration) indicated a small portion of Mn<sup>2+</sup> occupied into the Mn<sup>3+</sup>SOD<sub>cd</sub>, which is explained by our previous electrochemical experiment (1). After titration, the intensity of G=1000 almost didn't alter, indicating Mn<sup>3+</sup> has not been reduced by the pH titration.

## 2. Computationally-derived Coordinates for MnSOD<sub>cd</sub> and Fe-sub-MnSOD<sub>cd</sub>

Table S1a. Computationally-derived coordinates for the oxidized MnSOD<sub>cd</sub>

|   |           |           |           |
|---|-----------|-----------|-----------|
| C | -5.266880 | 0.551262  | 2.308121  |
| N | -4.059977 | -0.391310 | 0.640633  |
| C | 7.606514  | -1.818519 | 0.366405  |
| C | 4.926113  | -0.976867 | 0.086194  |
| O | 3.597263  | -0.595797 | -0.053399 |
| C | -2.061662 | 3.368950  | -1.206773 |
| N | -0.782245 | 2.896616  | -0.946093 |
| N | -2.128754 | 1.131963  | -0.793681 |
| C | 2.978367  | 4.457323  | -0.058005 |
| C | 2.789900  | 2.996390  | 0.070578  |
| O | 3.278555  | 1.886408  | 0.475837  |
| C | -2.724810 | -3.595685 | -1.435369 |
| O | -1.633443 | -3.341348 | -1.993077 |
| O | -3.422299 | -2.671879 | -0.757569 |
| C | 0.611067  | -0.736335 | 1.635814  |
| C | -3.364617 | -4.962709 | -1.478622 |
| H | -3.566793 | -5.320903 | -0.463455 |
| H | -4.324230 | -4.905135 | -2.004852 |
| H | -2.709348 | -5.665362 | -1.994850 |
| C | -2.356260 | 4.800749  | -1.511862 |
| H | -2.052146 | 5.460992  | -0.690345 |
| H | -1.827756 | 5.137139  | -2.412074 |
| H | -3.427811 | 4.942857  | -1.679281 |
| C | -2.891525 | 2.265846  | -1.117642 |
| H | -3.959938 | 2.211290  | -1.246927 |
| C | -0.858305 | 1.566787  | -0.712060 |
| H | 0.011950  | 0.978900  | -0.495074 |
| C | -5.847629 | 1.411424  | 3.380090  |
| H | -6.882319 | 1.700931  | 3.157318  |
| H | -5.843392 | 0.909500  | 4.355824  |
| H | -5.262245 | 2.328957  | 3.478622  |
| C | -4.183692 | 0.723053  | 1.480664  |
| H | -3.502697 | 1.551324  | 1.414904  |
| C | -5.055688 | -1.233787 | 0.950446  |
| H | -5.196721 | -2.194273 | 0.486043  |
| C | 1.510941  | -0.275452 | 2.733483  |
| H | 2.112289  | -1.097970 | 3.137752  |

|    |           |           |           |
|----|-----------|-----------|-----------|
| H  | 2.199889  | 0.496084  | 2.367663  |
| H  | 0.922604  | 0.147846  | 3.552273  |
| C  | -0.748788 | -0.639524 | 1.455936  |
| H  | -1.491995 | -0.222606 | 2.111434  |
| C  | 0.062777  | -1.590224 | -0.364299 |
| H  | 0.124685  | -2.067267 | -1.326300 |
| C  | 3.822197  | 5.094111  | -1.138079 |
| H  | 3.967300  | 4.402456  | -1.974855 |
| H  | 3.351166  | 6.006583  | -1.528817 |
| H  | 4.811844  | 5.370424  | -0.749228 |
| C  | 9.049111  | -2.261802 | 0.485816  |
| H  | 9.580749  | -1.692778 | 1.257013  |
| H  | 9.121731  | -3.324401 | 0.743768  |
| H  | 9.596427  | -2.118818 | -0.456737 |
| C  | 7.233901  | -0.485243 | 0.610744  |
| H  | 7.991581  | 0.232157  | 0.915725  |
| C  | 6.599177  | -2.720389 | -0.016896 |
| H  | 6.857321  | -3.758723 | -0.208440 |
| C  | 5.270972  | -2.310670 | -0.160646 |
| H  | 4.500956  | -3.012124 | -0.464109 |
| C  | 5.910786  | -0.057234 | 0.475985  |
| H  | 5.624297  | 0.970043  | 0.673824  |
| N  | 1.747800  | 3.550026  | -0.492901 |
| H  | 0.177108  | 3.376121  | -0.859340 |
| N  | 1.099300  | -1.332518 | 0.470309  |
| N  | -1.083508 | -1.159897 | 0.198977  |
| H  | 2.110044  | -1.348658 | 0.226067  |
| H  | 2.792442  | 5.086294  | 0.814687  |
| H  | -6.610479 | -1.126080 | 2.372594  |
| N  | -5.802735 | -0.693836 | 1.952582  |
| O  | -3.195321 | -0.496517 | -2.456397 |
| H  | -3.116265 | 0.380242  | -2.880237 |
| H  | 3.441131  | 0.409376  | 0.063024  |
| Mn | -2.780816 | -0.877096 | -0.786628 |

**Table S1b. Computationally-derived coordinates for the reductive MnSOD<sub>cd</sub>**

|   |           |           |           |
|---|-----------|-----------|-----------|
| C | 4.839033  | -2.413626 | -0.158610 |
| N | 3.427790  | -0.641572 | -0.352418 |
| C | -5.201683 | -2.514458 | -0.809612 |
| C | -3.617939 | -0.801316 | 0.810685  |
| O | -2.792055 | -0.025509 | 1.592660  |
| C | -0.637707 | -2.335206 | -1.847671 |

|   |           |           |           |
|---|-----------|-----------|-----------|
| N | -1.504597 | -1.255364 | -1.706145 |
| N | 0.455142  | -0.552548 | -0.955569 |
| C | -4.066246 | 3.202921  | 0.167069  |
| C | -2.623637 | 3.229187  | 0.225256  |
| O | -1.920182 | 2.150094  | 0.598718  |
| C | 2.630502  | 2.998447  | -2.015404 |
| O | 1.688660  | 3.758637  | -1.637411 |
| O | 2.847980  | 1.787039  | -1.540112 |
| C | 1.602195  | -0.206503 | 3.937310  |
| C | 3.603809  | 3.473976  | -3.073793 |
| H | 4.624309  | 3.468830  | -2.673950 |
| H | 3.582077  | 2.793461  | -3.932578 |
| H | 3.344138  | 4.482065  | -3.398407 |
| C | -1.071699 | -3.656211 | -2.389577 |
| H | -1.918686 | -4.060942 | -1.821579 |
| H | -1.380333 | -3.587874 | -3.440775 |
| H | -0.251546 | -4.377073 | -2.330587 |
| C | 0.577203  | -1.882607 | -1.383941 |
| H | 1.512741  | -2.409696 | -1.326547 |
| C | -0.821885 | -0.200319 | -1.171700 |
| H | -1.274443 | 0.741143  | -0.904406 |
| C | 5.555852  | -3.673230 | 0.198269  |
| H | 5.659202  | -4.345904 | -0.662864 |
| H | 6.562539  | -3.476794 | 0.589201  |
| H | 5.001512  | -4.211138 | 0.971745  |
| C | 3.673937  | -1.853559 | 0.310180  |
| H | 3.006686  | -2.217922 | 1.070560  |
| C | 4.431342  | -0.469672 | -1.220865 |
| H | 4.510397  | 0.376025  | -1.880524 |
| C | 2.034928  | -0.259180 | 5.364693  |
| H | 1.537636  | 0.508882  | 5.970778  |
| H | 1.822487  | -1.233131 | 5.824616  |
| H | 3.112302  | -0.087172 | 5.436217  |
| C | 2.297949  | 0.014436  | 2.771202  |
| H | 3.350419  | 0.201771  | 2.642087  |
| C | 0.203616  | -0.264819 | 2.172395  |
| H | -0.732197 | -0.321640 | 1.640518  |
| C | -4.814508 | 4.294744  | 0.843082  |
| H | -4.228648 | 5.208624  | 1.015182  |
| H | -5.763731 | 4.529381  | 0.349436  |
| H | -5.082746 | 3.874253  | 1.832628  |
| C | -6.076545 | -3.420405 | -1.650263 |
| H | -7.083106 | -3.522202 | -1.220551 |
| H | -6.199706 | -3.029428 | -2.666702 |

|    |           |           |           |
|----|-----------|-----------|-----------|
| H  | -5.656408 | -4.430215 | -1.727145 |
| C  | -4.449054 | -3.020398 | 0.266563  |
| H  | -4.476647 | -4.086200 | 0.481470  |
| C  | -5.150611 | -1.127506 | -1.043253 |
| H  | -5.740533 | -0.702705 | -1.852294 |
| C  | -4.380118 | -0.269032 | -0.248008 |
| H  | -4.390587 | 0.808179  | -0.416390 |
| C  | -3.668704 | -2.182212 | 1.066482  |
| H  | -3.081711 | -2.581228 | 1.886990  |
| N  | -2.202490 | 4.332873  | -0.356968 |
| H  | -1.291985 | 4.261053  | -0.833352 |
| N  | 0.277201  | -0.381788 | 3.532609  |
| N  | 1.421647  | -0.024487 | 1.676452  |
| H  | -0.522940 | -0.516799 | 4.130569  |
| H  | -2.506040 | -1.264753 | -1.849853 |
| H  | 6.139269  | -1.633015 | -1.681150 |
| N  | 5.302044  | -1.521202 | -1.132151 |
| H  | 0.892087  | 2.959027  | -0.458042 |
| O  | 0.638418  | 2.172094  | 0.111792  |
| H  | -0.330453 | 2.185238  | 0.420191  |
| H  | -2.584360 | 0.920215  | 1.211898  |
| Mn | 1.867163  | 0.654670  | -0.202607 |

**Table S1c. Computationally-derived coordinates for the oxidized Fe-sub-MnSOD<sub>cd</sub>**

|   |           |           |           |
|---|-----------|-----------|-----------|
| C | -5.021631 | 0.162687  | 2.610680  |
| N | -3.900912 | -0.547534 | 0.779818  |
| C | 7.551275  | -1.846170 | 0.403940  |
| C | 4.884824  | -0.936321 | 0.200230  |
| O | 3.564399  | -0.520507 | 0.099015  |
| C | -2.056792 | 3.268523  | -0.940156 |
| N | -0.785924 | 2.724095  | -1.077106 |
| N | -2.183058 | 1.006042  | -0.936167 |
| C | 2.876483  | 4.467305  | -0.288000 |
| C | 2.794928  | 3.013787  | -0.031718 |
| O | 3.364940  | 1.986880  | 0.470750  |
| C | -2.524263 | -2.899700 | -2.069105 |
| O | -1.835896 | -1.827997 | -2.342626 |
| O | -3.261263 | -2.831459 | -0.999783 |
| C | 0.526798  | -0.792074 | 1.768521  |
| C | -2.493465 | -4.107647 | -2.941636 |
| H | -2.695652 | -5.007475 | -2.356783 |
| H | -3.272813 | -4.012300 | -3.707679 |

|   |           |           |           |
|---|-----------|-----------|-----------|
| H | -1.529394 | -4.189224 | -3.448165 |
| C | -2.310139 | 4.739559  | -0.903074 |
| H | -1.744241 | 5.225792  | -0.099253 |
| H | -2.018202 | 5.221641  | -1.843929 |
| H | -3.372684 | 4.940902  | -0.738949 |
| C | -2.921587 | 2.193487  | -0.861544 |
| H | -3.992686 | 2.195498  | -0.750191 |
| C | -0.899321 | 1.378218  | -1.081497 |
| H | -0.056194 | 0.720178  | -1.167729 |
| C | -5.563822 | 0.885016  | 3.798479  |
| H | -6.627329 | 1.127919  | 3.679927  |
| H | -5.455757 | 0.298736  | 4.719732  |
| H | -5.024895 | 1.825071  | 3.941139  |
| C | -4.016434 | 0.475413  | 1.725029  |
| H | -3.388141 | 1.347309  | 1.691269  |
| C | -4.817923 | -1.471855 | 1.074500  |
| H | -4.971302 | -2.380614 | 0.518676  |
| C | 1.377677  | -0.325783 | 2.902995  |
| H | 1.977956  | -1.140483 | 3.325252  |
| H | 2.069672  | 0.456960  | 2.568640  |
| H | 0.754878  | 0.084578  | 3.702588  |
| C | -0.835676 | -0.781875 | 1.566945  |
| H | -1.611267 | -0.463653 | 2.238828  |
| C | 0.064670  | -1.570243 | -0.274417 |
| H | 0.196084  | -1.921379 | -1.281463 |
| C | 3.699919  | 5.067856  | -1.403932 |
| H | 3.910349  | 4.319714  | -2.175668 |
| H | 3.177820  | 5.909385  | -1.879604 |
| H | 4.659546  | 5.443285  | -1.023015 |
| C | 8.984469  | -2.327443 | 0.483134  |
| H | 9.564742  | -1.742070 | 1.205654  |
| H | 9.037404  | -3.379444 | 0.785260  |
| H | 9.495377  | -2.241990 | -0.486454 |
| C | 7.231911  | -0.486703 | 0.567244  |
| H | 8.026048  | 0.224977  | 0.778559  |
| C | 6.498387  | -2.738734 | 0.141326  |
| H | 6.714635  | -3.796545 | 0.015434  |
| C | 5.177133  | -2.295608 | 0.036530  |
| H | 4.371417  | -2.992124 | -0.170928 |
| C | 5.917232  | -0.024902 | 0.469144  |
| H | 5.673469  | 1.023326  | 0.604159  |
| N | 1.728494  | 3.434917  | -0.661522 |
| H | 0.194949  | 3.178944  | -1.011191 |
| N | 1.072708  | -1.298524 | 0.592414  |

|    |           |           |           |
|----|-----------|-----------|-----------|
| N  | -1.120047 | -1.251488 | 0.279976  |
| H  | 2.088376  | -1.251116 | 0.365052  |
| H  | 2.624112  | 5.154044  | 0.522201  |
| H  | -6.262278 | -1.592463 | 2.610429  |
| N  | -5.512863 | -1.075226 | 2.178804  |
| O  | -4.180388 | -0.564574 | -1.946182 |
| H  | -4.430732 | 0.371388  | -2.075592 |
| H  | 3.439138  | 0.499693  | 0.177449  |
| Fe | -2.791287 | -0.870151 | -0.819165 |

**Table S1d. Computationally-derived coordinates for the reductive Fe-sub-MnSOD<sub>cd</sub>**

|    |           |           |           |
|----|-----------|-----------|-----------|
| C  | 3.942025  | -3.205194 | -0.198779 |
| N  | 2.949925  | -1.222926 | -0.701717 |
| C  | -5.392627 | -2.187161 | 0.574541  |
| C  | -3.565708 | -0.145784 | 1.319634  |
| O  | -2.631115 | 0.794598  | 1.699661  |
| C  | -1.177693 | -2.530979 | -1.917728 |
| N  | -1.961208 | -1.462359 | -1.487686 |
| N  | 0.136134  | -0.830810 | -1.163418 |
| C  | -3.934847 | 3.353341  | -0.783626 |
| C  | -2.496209 | 3.242264  | -0.900138 |
| O  | -1.812119 | 2.377646  | -0.131836 |
| C  | 3.575407  | 2.690301  | -0.822418 |
| O  | 2.654569  | 3.557031  | -0.711263 |
| O  | 3.375901  | 1.391139  | -0.863593 |
| Fe | 1.710624  | 0.313092  | -0.712128 |
| C  | 2.215297  | 0.572962  | 3.366249  |
| C  | 5.018720  | 3.138331  | -0.939624 |
| H  | 5.638242  | 2.616675  | -0.202467 |
| H  | 5.406613  | 2.885300  | -1.933734 |
| H  | 5.090260  | 4.216453  | -0.791339 |
| C  | -1.752391 | -3.795410 | -2.463856 |
| H  | -2.421319 | -4.282062 | -1.742761 |
| H  | -2.327885 | -3.620334 | -3.381851 |
| H  | -0.951792 | -4.500303 | -2.704495 |
| C  | 0.120930  | -2.123022 | -1.717186 |
| H  | 1.027340  | -2.660224 | -1.928282 |
| C  | -1.148201 | -0.460036 | -1.050587 |
| H  | -1.511431 | 0.496569  | -0.706157 |
| C  | 4.317904  | -4.560288 | 0.301538  |
| H  | 4.493587  | -5.268340 | -0.518735 |
| H  | 5.225826  | -4.534174 | 0.917839  |



|   |           |           |           |
|---|-----------|-----------|-----------|
| H | 3.512576  | -4.965602 | 0.919672  |
| C | 2.815265  | -2.437657 | -0.016409 |
| H | 1.931339  | -2.659749 | 0.554143  |
| C | 4.149298  | -1.246722 | -1.291989 |
| H | 4.579269  | -0.428407 | -1.838567 |
| C | 2.941215  | 0.730911  | 4.660643  |
| H | 2.721134  | 1.694355  | 5.138253  |
| H | 2.685076  | -0.060757 | 5.376890  |
| H | 4.020468  | 0.687332  | 4.491440  |
| C | 2.662562  | 0.411538  | 2.076331  |
| H | 3.669102  | 0.376367  | 1.700735  |
| C | 0.462809  | 0.435892  | 1.953993  |
| H | -0.566388 | 0.436658  | 1.630622  |
| C | -4.504568 | 4.716189  | -0.628464 |
| H | -3.854454 | 5.522014  | -0.998081 |
| H | -5.515617 | 4.807913  | -1.039112 |
| H | -4.606417 | 4.847838  | 0.467509  |
| C | -6.394598 | -3.259660 | 0.202375  |
| H | -7.327498 | -3.156901 | 0.774463  |
| H | -6.662381 | -3.208643 | -0.859235 |
| H | -6.003800 | -4.264267 | 0.403029  |
| C | -4.506151 | -2.361160 | 1.652949  |
| H | -4.521191 | -3.295460 | 2.209174  |
| C | -5.345859 | -0.960975 | -0.114350 |
| H | -6.036514 | -0.785716 | -0.936436 |
| C | -4.454095 | 0.058542  | 0.245819  |
| H | -4.463351 | 1.017752  | -0.273961 |
| C | -3.605206 | -1.360820 | 2.023386  |
| H | -2.918391 | -1.505921 | 2.850544  |
| N | -2.075693 | 3.902090  | -1.957472 |
| H | -1.210070 | 3.523782  | -2.369791 |
| N | 0.822342  | 0.581830  | 3.266020  |
| N | 1.567409  | 0.326727  | 1.206791  |
| H | 0.167674  | 0.715327  | 4.020026  |
| H | -2.970897 | -1.430634 | -1.423685 |
| H | 5.692140  | -2.699429 | -1.336547 |
| N | 4.776161  | -2.433478 | -1.013137 |
| H | 1.261956  | 2.746004  | -0.859757 |
| O | 0.644595  | 1.954025  | -0.958475 |
| H | -0.291508 | 2.141777  | -0.611851 |
| H | -2.457718 | 1.538958  | 1.002380  |

**3. The DFT computationally-derived coordinates for the reactants, products and transition states in MnSOD<sub>cd</sub> and Fe-sub-MnSOD<sub>cd</sub>.**

**Table S2a. Computationally-derived Coordinates for the reactant of oxidized**

**MnSOD<sub>cd</sub> and OOH**

|   |           |           |           |
|---|-----------|-----------|-----------|
| C | 2.678099  | -3.177473 | -2.237248 |
| N | 2.957154  | -1.331362 | -0.958198 |
| C | -7.038567 | -2.516333 | -0.095993 |
| C | -4.737637 | -0.972118 | 0.462422  |
| O | -3.591394 | -0.241921 | 0.746682  |
| C | 0.128504  | 1.966366  | -2.617588 |
| N | -0.095171 | 2.709920  | -1.457997 |
| N | 1.593182  | 1.340028  | -1.017367 |
| C | -3.624148 | 4.629496  | -0.564657 |
| C | -3.511160 | 3.216798  | -0.140220 |
| O | -4.060602 | 2.239411  | 0.462133  |
| C | 3.516854  | 0.776021  | 2.452646  |
| O | 2.721117  | 1.584943  | 1.812389  |
| O | 3.762729  | -0.363263 | 1.857795  |
| C | -0.391858 | -1.645192 | 2.409445  |
| C | 4.142832  | 1.132075  | 3.755110  |
| H | 4.115603  | 0.276688  | 4.435535  |
| H | 5.197108  | 1.382824  | 3.584990  |
| H | 3.639182  | 1.990568  | 4.201146  |
| C | -0.694924 | 2.151927  | -3.849248 |
| H | -1.763988 | 2.145321  | -3.609267 |
| H | -0.477708 | 3.109600  | -4.338273 |
| H | -0.496886 | 1.353901  | -4.570280 |
| C | 1.184274  | 1.123077  | -2.338075 |
| H | 1.663091  | 0.392528  | -2.966350 |
| C | 0.803405  | 2.323531  | -0.528090 |
| H | 0.850422  | 2.699000  | 0.479543  |
| C | 2.181746  | -4.320246 | -3.058452 |
| H | 2.602761  | -4.311278 | -4.071819 |
| H | 2.428217  | -5.288097 | -2.603816 |
| H | 1.094015  | -4.268030 | -3.152343 |
| C | 2.023638  | -2.142492 | -1.613578 |
| H | 0.969069  | -1.936210 | -1.576034 |

|    |           |           |           |
|----|-----------|-----------|-----------|
| C  | 4.168628  | -1.857642 | -1.173946 |
| H  | 5.114419  | -1.468615 | -0.811902 |
| C  | -1.030523 | -2.444162 | 3.496572  |
| H  | -1.671770 | -1.820889 | 4.131517  |
| H  | -1.653124 | -3.253237 | 3.095613  |
| H  | -0.264576 | -2.894789 | 4.133277  |
| C  | 0.933121  | -1.396023 | 2.120394  |
| H  | 1.822018  | -1.738010 | 2.619905  |
| C  | -0.259419 | -0.327773 | 0.613663  |
| H  | -0.579639 | 0.266646  | -0.220234 |
| C  | -3.439999 | 5.792792  | 0.382273  |
| H  | -2.881056 | 5.485677  | 1.272797  |
| H  | -2.892858 | 6.615427  | -0.097427 |
| H  | -4.412189 | 6.184627  | 0.710052  |
| C  | -8.279120 | -3.339565 | -0.369864 |
| H  | -8.886163 | -2.898221 | -1.169115 |
| H  | -8.021945 | -4.361026 | -0.670857 |
| H  | -8.921188 | -3.413184 | 0.519051  |
| C  | -7.090858 | -1.110876 | -0.077375 |
| H  | -8.033897 | -0.610531 | -0.282436 |
| C  | -5.802005 | -3.127381 | 0.167535  |
| H  | -5.729288 | -4.211870 | 0.154029  |
| C  | -4.659890 | -2.370010 | 0.444223  |
| H  | -3.707992 | -2.855257 | 0.635651  |
| C  | -5.961867 | -0.337219 | 0.199966  |
| H  | -6.009209 | 0.746098  | 0.214490  |
| N  | -2.428683 | 3.612259  | -0.764630 |
| H  | -1.032685 | 3.251908  | -1.220987 |
| N  | -1.121605 | -0.961101 | 1.440120  |
| N  | 1.008782  | -0.558436 | 1.000091  |
| H  | -2.153723 | -0.839223 | 1.328312  |
| H  | -4.179660 | 4.857105  | -1.475687 |
| H  | 4.794978  | -3.557329 | -2.250328 |
| N  | 4.031692  | -2.973419 | -1.946667 |
| O  | 4.276648  | 1.069300  | -0.429664 |
| H  | 4.141784  | 1.867802  | -0.968579 |
| H  | -3.711411 | 0.781099  | 0.636450  |
| Mn | 2.706705  | 0.271904  | 0.227865  |
| O  | 6.611983  | 0.608760  | 0.297401  |
| H  | 5.605923  | 0.822498  | -0.005808 |
| O  | 6.869835  | -0.688704 | -0.108538 |

**Table S2b. Computationally-derived coordinates for the transition state of oxidized MnSOD<sub>cd</sub> and OOH**

|   |           |           |           |
|---|-----------|-----------|-----------|
| C | 4.096945  | 2.239135  | -2.516476 |
| N | 3.165867  | 0.613035  | -1.249898 |
| C | -7.325338 | -1.691536 | -0.260530 |
| C | -4.681648 | -0.730573 | -0.530887 |
| O | -3.371398 | -0.292458 | -0.674250 |
| C | 0.568115  | 1.898890  | 2.858043  |
| N | 0.353451  | 2.482581  | 1.610663  |
| N | 1.852697  | 0.874293  | 1.305941  |
| C | -2.776105 | 4.684372  | 0.029956  |
| C | -2.766055 | 3.228794  | -0.234162 |
| O | -3.323000 | 2.252509  | -0.833493 |
| C | 2.447579  | -2.988691 | 2.028969  |
| O | 2.687290  | -1.663613 | 1.943191  |
| O | 2.326677  | -3.746672 | 1.049941  |
| C | -0.316762 | -2.413165 | -1.769040 |
| C | 2.336378  | -3.474548 | 3.459819  |
| H | 1.493765  | -2.981742 | 3.957527  |
| H | 2.187473  | -4.554975 | 3.472405  |
| H | 3.242814  | -3.218754 | 4.018554  |
| C | -0.153760 | 2.345884  | 4.086066  |
| H | 0.152666  | 3.353989  | 4.391907  |
| H | -1.237261 | 2.370431  | 3.921637  |
| H | 0.049846  | 1.665877  | 4.917861  |
| C | 1.508393  | 0.907665  | 2.661588  |
| H | 1.916670  | 0.190871  | 3.350549  |
| C | 1.142155  | 1.854132  | 0.711557  |
| H | 1.146195  | 2.083096  | -0.337700 |
| C | 4.875006  | 3.379381  | -3.082511 |
| H | 5.506838  | 3.066888  | -3.923370 |
| H | 4.221555  | 4.187006  | -3.435550 |
| H | 5.530652  | 3.797292  | -2.314696 |
| C | 4.081345  | 1.670260  | -1.265039 |
| H | 4.657138  | 1.898736  | -0.386653 |
| C | 2.630459  | 0.530126  | -2.471149 |
| H | 1.898098  | -0.189764 | -2.790934 |
| C | -0.997693 | -3.322836 | -2.736931 |
| H | -1.679909 | -4.014058 | -2.227212 |
| H | -1.586477 | -2.765904 | -3.476113 |
| H | -0.258342 | -3.922710 | -3.274149 |

|    |           |           |           |
|----|-----------|-----------|-----------|
| C  | 1.012276  | -2.272489 | -1.430687 |
| H  | 1.870871  | -2.833635 | -1.754773 |
| C  | -0.118321 | -0.855133 | -0.183064 |
| H  | -0.403274 | -0.107736 | 0.531915  |
| C  | -3.718715 | 5.340204  | 1.012609  |
| H  | -4.105818 | 4.606414  | 1.727879  |
| H  | -3.215991 | 6.136016  | 1.578960  |
| H  | -4.574231 | 5.790900  | 0.491587  |
| C  | -8.741777 | -2.197747 | -0.089617 |
| H  | -9.430061 | -1.711111 | -0.790813 |
| H  | -8.802561 | -3.278570 | -0.257573 |
| H  | -9.122107 | -2.003136 | 0.923011  |
| C  | -7.065836 | -0.328860 | -0.491979 |
| H  | -7.898458 | 0.365656  | -0.571248 |
| C  | -6.225451 | -2.560428 | -0.171500 |
| H  | -6.395021 | -3.619541 | 0.004381  |
| C  | -4.914860 | -2.091780 | -0.301619 |
| H  | -4.073200 | -2.772084 | -0.220073 |
| C  | -5.763904 | 0.157874  | -0.628437 |
| H  | -5.569712 | 1.208928  | -0.811791 |
| N  | -1.780605 | 3.572063  | 0.559081  |
| H  | -0.491060 | 3.096177  | 1.287572  |
| N  | -1.007100 | -1.503168 | -0.968344 |
| N  | 1.129801  | -1.280618 | -0.447316 |
| H  | -2.015325 | -1.235426 | -0.965066 |
| H  | -2.351782 | 5.354160  | -0.720288 |
| H  | 2.936618  | 1.659257  | -4.230824 |
| N  | 3.168677  | 1.502354  | -3.262492 |
| O  | 4.581057  | -0.026887 | 1.046958  |
| H  | 4.626810  | -0.020683 | 2.021005  |
| H  | -3.281210 | 0.734716  | -0.717641 |
| O  | 5.215475  | -2.037803 | -0.388417 |
| H  | 5.306917  | -1.072972 | 0.466681  |
| O  | 3.864517  | -1.962974 | -0.661681 |
| Mn | 2.837114  | -0.604712 | 0.373669  |

**Table S2c. Computationally-derived coordinates for the product of reductive**

**MnSOD<sub>cd</sub> and O<sub>2</sub>**

|   |           |           |           |
|---|-----------|-----------|-----------|
| C | 4.848432  | -2.559659 | -0.434364 |
| N | 3.535455  | -0.737656 | -0.100469 |
| C | -4.873272 | -2.298668 | -1.581531 |

|   |           |           |           |
|---|-----------|-----------|-----------|
| C | -3.650869 | -1.162044 | 0.714130  |
| O | -3.015887 | -0.650299 | 1.830884  |
| C | -0.528057 | -1.563805 | -2.746220 |
| N | -1.415555 | -0.683609 | -2.127359 |
| N | 0.583884  | -0.202717 | -1.301499 |
| C | -4.062503 | 2.824605  | 1.249796  |
| C | -2.621612 | 2.794856  | 1.261616  |
| O | -1.935319 | 1.647876  | 1.367059  |
| C | 2.930409  | 3.269125  | -0.559313 |
| O | 1.904770  | 3.875627  | -0.119386 |
| O | 3.143015  | 1.976501  | -0.440963 |
| C | 0.764354  | -1.958842 | 3.649307  |
| C | 4.009511  | 4.050555  | -1.279608 |
| H | 4.975583  | 3.901768  | -0.784297 |
| H | 4.105676  | 3.687079  | -2.309120 |
| H | 3.762051  | 5.112463  | -1.290008 |
| C | -0.963727 | -2.589549 | -3.739004 |
| H | -1.736280 | -3.248725 | -3.323459 |
| H | -1.373658 | -2.132663 | -4.648976 |
| H | -0.114804 | -3.212279 | -4.034602 |
| C | 0.708190  | -1.245601 | -2.225920 |
| H | 1.663865  | -1.690586 | -2.444997 |
| C | -0.715581 | 0.120282  | -1.273185 |
| H | -1.171021 | 0.866375  | -0.641394 |
| C | 5.460571  | -3.917460 | -0.530310 |
| H | 5.708741  | -4.185035 | -1.565471 |
| H | 6.380395  | -3.996857 | 0.063301  |
| H | 4.760769  | -4.668609 | -0.154894 |
| C | 3.625053  | -2.130330 | 0.024032  |
| H | 2.814330  | -2.706702 | 0.433156  |
| C | 4.689454  | -0.320832 | -0.630695 |
| H | 4.901432  | 0.708983  | -0.858777 |
| C | 0.789344  | -2.749061 | 4.915188  |
| H | 0.262985  | -2.233104 | 5.728176  |
| H | 0.323408  | -3.735423 | 4.793656  |
| H | 1.821816  | -2.906956 | 5.238728  |
| C | 1.777968  | -1.428279 | 2.878176  |
| H | 2.841403  | -1.477847 | 3.039227  |
| C | -0.095483 | -0.868955 | 1.893025  |
| H | -0.833629 | -0.449513 | 1.245469  |
| C | -4.765060 | 3.753609  | 2.172833  |
| H | -4.148383 | 4.588098  | 2.534933  |
| H | -5.712561 | 4.122007  | 1.764949  |
| H | -5.033890 | 3.127436  | 3.046349  |

|    |           |           |           |
|----|-----------|-----------|-----------|
| C  | -5.568864 | -2.908198 | -2.780763 |
| H  | -6.618001 | -3.148210 | -2.558133 |
| H  | -5.571993 | -2.223325 | -3.636514 |
| H  | -5.085934 | -3.840302 | -3.096502 |
| C  | -4.225220 | -3.104521 | -0.627827 |
| H  | -4.194006 | -4.181743 | -0.772731 |
| C  | -4.900002 | -0.909405 | -1.350394 |
| H  | -5.419962 | -0.262955 | -2.054132 |
| C  | -4.306922 | -0.335906 | -0.218336 |
| H  | -4.375066 | 0.735663  | -0.029657 |
| C  | -3.621418 | -2.549638 | 0.503563  |
| H  | -3.113568 | -3.178643 | 1.227249  |
| N  | -2.196894 | 3.992354  | 0.910224  |
| H  | -1.320849 | 4.012982  | 0.369280  |
| N  | -0.414181 | -1.595759 | 2.994679  |
| N  | 1.228881  | -0.744678 | 1.782611  |
| H  | -1.376623 | -1.753782 | 3.262508  |
| H  | -2.425774 | -0.695701 | -2.201414 |
| H  | 6.437697  | -1.350671 | -1.230077 |
| N  | 5.508816  | -1.393448 | -0.841954 |
| H  | 0.953796  | 2.796171  | 0.610975  |
| O  | 0.665443  | 1.879066  | 0.910147  |
| H  | -0.292374 | 1.801969  | 1.222598  |
| H  | -2.723643 | 0.337869  | 1.715166  |
| Mn | 1.983388  | 0.510040  | 0.336567  |
| O  | -0.543903 | 3.353419  | -2.149620 |
| O  | 0.444675  | 3.544647  | -2.897312 |

**Table S2d. Computationally-derived coordinates for the reactant of reductive**

**MnSOD<sub>cd</sub> and OOH**

|   |           |           |           |
|---|-----------|-----------|-----------|
| C | 4.104933  | 2.074906  | -2.537362 |
| N | 3.506188  | 0.508054  | -1.014539 |
| C | -7.635633 | -2.254022 | -0.217102 |
| C | -5.048523 | -1.119585 | -0.196941 |
| O | -3.766288 | -0.589275 | -0.183956 |
| C | 0.826968  | 2.258274  | 2.836068  |
| N | 0.096715  | 2.403933  | 1.661979  |
| N | 1.718268  | 0.957524  | 1.209315  |
| C | -3.165337 | 4.377055  | 0.094162  |
| C | -3.183880 | 2.908527  | -0.064682 |

|   |           |           |           |
|---|-----------|-----------|-----------|
| O | -3.733604 | 1.903044  | -0.632501 |
| C | 2.703548  | -3.030250 | 0.943501  |
| O | 2.012061  | -2.168929 | 1.623992  |
| O | 3.345894  | -2.524986 | -0.077804 |
| C | -0.809375 | -0.575884 | -2.026727 |
| C | 2.755821  | -4.477142 | 1.291450  |
| H | 3.425754  | -5.010647 | 0.616648  |
| H | 3.106253  | -4.595048 | 2.321631  |
| H | 1.752349  | -4.912315 | 1.230484  |
| C | 0.485836  | 2.975754  | 4.099882  |
| H | 0.578826  | 4.063013  | 3.987627  |
| H | -0.543841 | 2.766479  | 4.413181  |
| H | 1.153849  | 2.662398  | 4.906896  |
| C | 1.835934  | 1.361370  | 2.543954  |
| H | 2.598199  | 0.955864  | 3.186387  |
| C | 0.653316  | 1.617941  | 0.714279  |
| H | 0.241113  | 1.507131  | -0.272482 |
| C | 4.212307  | 3.237341  | -3.466833 |
| H | 5.082600  | 3.864872  | -3.237510 |
| H | 4.296883  | 2.918753  | -4.513469 |
| H | 3.321932  | 3.865610  | -3.383540 |
| C | 3.120753  | 1.689658  | -1.658082 |
| H | 2.190816  | 2.179284  | -1.435525 |
| C | 4.717099  | 0.175825  | -1.487323 |
| H | 5.319691  | -0.661245 | -1.148900 |
| C | -1.748200 | -0.147032 | -3.105732 |
| H | -2.307941 | -0.995706 | -3.516372 |
| H | -2.477795 | 0.574942  | -2.718638 |
| H | -1.198071 | 0.322042  | -3.925969 |
| C | 0.562575  | -0.503779 | -1.906100 |
| H | 1.287454  | -0.150682 | -2.617244 |
| C | -0.194278 | -1.377128 | -0.033839 |
| H | -0.248205 | -1.764605 | 0.967263  |
| C | -4.135659 | 5.128049  | 0.976240  |
| H | -4.579914 | 4.458788  | 1.720713  |
| H | -3.637624 | 5.948818  | 1.510106  |
| H | -4.949741 | 5.562607  | 0.380383  |
| C | -9.024778 | -2.855288 | -0.196995 |
| H | -9.699358 | -2.327990 | -0.881066 |
| H | -9.008634 | -3.910966 | -0.490359 |
| H | -9.474366 | -2.803652 | 0.804768  |
| C | -7.441862 | -0.880989 | -0.448467 |
| H | -8.303228 | -0.246599 | -0.641408 |
| C | -6.498225 | -3.044929 | 0.018569  |



|    |           |           |           |
|----|-----------|-----------|-----------|
| H  | -6.617081 | -4.110836 | 0.195339  |
| C  | -5.215663 | -2.490346 | 0.032846  |
| H  | -4.344248 | -3.108568 | 0.221757  |
| C  | -6.167293 | -0.309003 | -0.441796 |
| H  | -6.022898 | 0.749520  | -0.630128 |
| N  | -2.236259 | 3.272717  | 0.760072  |
| H  | -0.841913 | 2.895109  | 1.456330  |
| N  | -1.260486 | -1.129443 | -0.830536 |
| N  | 0.941426  | -0.994371 | -0.649153 |
| H  | -2.266629 | -1.153003 | -0.546675 |
| H  | -2.679162 | 4.978766  | -0.676115 |
| H  | 5.977855  | 1.085864  | -2.910563 |
| N  | 5.103090  | 1.102225  | -2.409743 |
| O  | 4.122243  | -0.397737 | 1.472281  |
| H  | 4.460520  | 0.516670  | 1.546388  |
| H  | -3.732909 | 0.442255  | -0.282533 |
| O  | 6.019958  | -2.323533 | -0.173754 |
| H  | 5.156488  | -2.779792 | -0.362866 |
| O  | 5.975620  | -2.317916 | 1.345386  |
| H  | 5.345188  | -1.543798 | 1.511563  |
| Mn | 2.659433  | -0.646764 | 0.422206  |

**Table S2e. Computationally-derived coordinates for the transition state of reductive MnSOD<sub>cd</sub> and OOH**

|   |           |           |           |
|---|-----------|-----------|-----------|
| C | 4.348901  | 2.068225  | -2.755767 |
| N | 3.470664  | 0.416615  | -1.479289 |
| C | -7.613716 | -2.024979 | -0.387581 |
| C | -4.998796 | -0.973078 | -0.201132 |
| O | -3.701773 | -0.485260 | -0.113525 |
| C | 1.019832  | 1.676674  | 2.863750  |
| N | 0.383336  | 2.184191  | 1.727073  |
| N | 1.904149  | 0.744477  | 1.007225  |
| C | -2.958989 | 4.416734  | 0.726057  |
| C | -3.005752 | 2.979485  | 0.385391  |
| O | -3.626398 | 2.048388  | -0.234164 |
| C | 2.843000  | -3.115963 | 0.371741  |
| O | 2.235252  | -2.308519 | 1.193263  |
| O | 3.237620  | -2.552549 | -0.741412 |
| C | -0.903306 | -0.249058 | -2.135865 |
| C | 3.125530  | -4.535196 | 0.705001  |
| H | 3.440259  | -5.088314 | -0.180720 |

|   |           |           |           |
|---|-----------|-----------|-----------|
| H | 3.931261  | -4.539002 | 1.450138  |
| H | 2.247618  | -5.006806 | 1.155646  |
| C | 0.645308  | 2.092769  | 4.247236  |
| H | 0.839798  | 3.158967  | 4.417103  |
| H | -0.419874 | 1.919784  | 4.442146  |
| H | 1.222472  | 1.523668  | 4.980600  |
| C | 1.965552  | 0.782191  | 2.410851  |
| H | 2.667431  | 0.161691  | 2.954616  |
| C | 0.938575  | 1.616212  | 0.639779  |
| H | 0.587480  | 1.778648  | -0.363841 |
| C | 4.813327  | 3.350371  | -3.361603 |
| H | 5.902639  | 3.371164  | -3.490158 |
| H | 4.356773  | 3.528959  | -4.343100 |
| H | 4.541488  | 4.187551  | -2.714088 |
| C | 3.671530  | 1.796483  | -1.588674 |
| H | 3.310708  | 2.476645  | -0.837458 |
| C | 4.019284  | -0.151653 | -2.558611 |
| H | 4.048382  | -1.210599 | -2.752140 |
| C | -1.918886 | 0.369009  | -3.038751 |
| H | -2.552722 | -0.388704 | -3.514410 |
| H | -2.575449 | 1.044972  | -2.477199 |
| H | -1.426954 | 0.942015  | -3.829567 |
| C | 0.474103  | -0.217548 | -2.131966 |
| H | 1.140089  | 0.251178  | -2.833466 |
| C | -0.138802 | -1.374845 | -0.363079 |
| H | -0.114599 | -1.918776 | 0.564205  |
| C | -3.813389 | 5.040003  | 1.805426  |
| H | -4.169396 | 4.277251  | 2.506106  |
| H | -3.251054 | 5.791200  | 2.376484  |
| H | -4.690306 | 5.538780  | 1.370828  |
| C | -9.017945 | -2.586517 | -0.455987 |
| H | -9.673904 | -1.952832 | -1.063676 |
| H | -9.026353 | -3.592074 | -0.891391 |
| H | -9.473433 | -2.660893 | 0.541624  |
| C | -7.383745 | -0.638409 | -0.416671 |
| H | -8.227912 | 0.039283  | -0.515609 |
| C | -6.498146 | -2.871073 | -0.268034 |
| H | -6.645026 | -3.947858 | -0.247337 |
| C | -5.201931 | -2.357802 | -0.171994 |
| H | -4.347440 | -3.019098 | -0.073005 |
| C | -6.095075 | -0.106433 | -0.325879 |
| H | -5.922435 | 0.964023  | -0.358292 |
| N | -1.963997 | 3.246238  | 1.129778  |
| H | -0.536798 | 2.745400  | 1.636747  |

|    |           |           |           |
|----|-----------|-----------|-----------|
| N  | -1.263068 | -0.985099 | -1.008156 |
| N  | 0.948361  | -0.911375 | -1.011834 |
| H  | -2.242386 | -1.032573 | -0.644367 |
| H  | -2.563699 | 5.115916  | -0.013165 |
| H  | 5.041275  | 0.660143  | -4.223122 |
| N  | 4.558673  | 0.819927  | -3.352586 |
| O  | 4.339514  | -0.632728 | 0.913555  |
| H  | 4.929379  | 0.112465  | 0.702906  |
| H  | -3.640469 | 0.547204  | -0.072437 |
| O  | 4.445907  | -2.669425 | 3.170543  |
| H  | 3.533700  | -2.791520 | 3.515045  |
| O  | 4.518508  | -1.153531 | 3.134034  |
| H  | 4.460716  | -0.942307 | 1.902569  |
| Mn | 2.701764  | -0.741400 | -0.028154 |

**Table S2f. Computationally-derived Coordinates for the product of oxidized MnSOD<sub>cd</sub> and H<sub>2</sub>O<sub>2</sub>**

|   |           |           |           |
|---|-----------|-----------|-----------|
| C | -3.906412 | -4.165304 | -1.788298 |
| N | -3.391678 | -2.107180 | -0.997779 |
| C | 7.089521  | 3.267525  | -1.292793 |
| C | 4.746154  | 1.804679  | -0.708485 |
| O | 3.575838  | 1.107406  | -0.436140 |
| C | -0.910759 | -3.220801 | 2.765158  |
| N | 0.215064  | -2.547149 | 2.310400  |
| N | -1.486689 | -1.783870 | 1.097283  |
| C | 4.358176  | -2.880111 | 2.632225  |
| C | 3.814733  | -1.931452 | 1.636512  |
| O | 4.063355  | -1.156521 | 0.650398  |
| C | -3.455450 | 1.930517  | -1.248091 |
| O | -2.481612 | 2.434664  | -0.644783 |
| O | -3.709739 | 0.613276  | -1.238540 |
| C | 1.123669  | -0.790978 | -1.915559 |
| C | -4.442764 | 2.756076  | -2.037965 |
| H | -4.527624 | 2.373073  | -3.060509 |
| H | -5.434371 | 2.686276  | -1.576319 |
| H | -4.125660 | 3.799490  | -2.057850 |
| C | -0.866363 | -4.239761 | 3.855893  |
| H | -0.209379 | -5.079921 | 3.599326  |
| H | -0.492920 | -3.809681 | 4.793153  |
| H | -1.866543 | -4.639861 | 4.045707  |
| C | -1.965070 | -2.735598 | 2.012499  |

|   |           |           |           |
|---|-----------|-----------|-----------|
| H | -3.007010 | -3.007046 | 2.054822  |
| C | -0.163867 | -1.699534 | 1.327128  |
| H | 0.537143  | -1.060634 | 0.826513  |
| C | -3.985058 | -5.612301 | -2.143520 |
| H | -4.923282 | -6.067482 | -1.802058 |
| H | -3.910007 | -5.773058 | -3.226332 |
| H | -3.163298 | -6.156485 | -1.671458 |
| C | -3.021910 | -3.458439 | -1.010060 |
| H | -2.171043 | -3.810789 | -0.456772 |
| C | -4.488811 | -1.989481 | -1.759003 |
| H | -4.983704 | -1.055240 | -1.960020 |
| C | 2.336939  | -1.442187 | -2.490794 |
| H | 2.768698  | -0.849055 | -3.305266 |
| H | 3.107800  | -1.566205 | -1.720052 |
| H | 2.084449  | -2.429259 | -2.887867 |
| C | -0.164036 | -1.237252 | -1.732977 |
| H | -0.601007 | -2.180045 | -2.008724 |
| C | -0.067558 | 0.787604  | -0.857338 |
| H | -0.354254 | 1.710622  | -0.385160 |
| C | 5.064873  | -2.444945 | 3.895262  |
| H | 4.812839  | -1.408209 | 4.142953  |
| H | 4.784117  | -3.076516 | 4.749334  |
| H | 6.155020  | -2.511151 | 3.776213  |
| C | 8.348006  | 4.056073  | -1.586775 |
| H | 9.095192  | 3.445220  | -2.108709 |
| H | 8.133630  | 4.927713  | -2.214427 |
| H | 8.820211  | 4.423556  | -0.665353 |
| C | 7.155658  | 1.999387  | -0.687386 |
| H | 8.126356  | 1.575525  | -0.442183 |
| C | 5.818873  | 3.780221  | -1.600471 |
| H | 5.737610  | 4.757121  | -2.069759 |
| C | 4.653651  | 3.063064  | -1.312050 |
| H | 3.676117  | 3.471480  | -1.545748 |
| C | 6.003895  | 1.266373  | -0.395069 |
| H | 6.057796  | 0.285092  | 0.063931  |
| N | 2.860826  | -2.401950 | 2.397123  |
| H | 1.261926  | -2.617384 | 2.550304  |
| N | 1.159409  | 0.485215  | -1.347672 |
| N | -0.899107 | -0.254121 | -1.057841 |
| H | 2.046375  | 0.990093  | -1.149066 |
| H | 4.561216  | -3.905920 | 2.318724  |
| H | -5.611100 | -3.401765 | -2.853114 |
| N | -4.825900 | -3.213894 | -2.249895 |
| O | -3.282111 | 0.009313  | 1.427364  |

|    |           |           |           |
|----|-----------|-----------|-----------|
| H  | -3.064345 | -0.384798 | 2.294446  |
| H  | 3.724592  | 0.236083  | 0.080052  |
| Mn | -2.632878 | -0.501107 | -0.129240 |
| O  | -6.335977 | 10.279428 | 3.277603  |
| H  | -5.706885 | 9.751556  | 3.818948  |
| O  | -5.943268 | 9.728944  | 1.904242  |
| H  | -6.488619 | 10.333608 | 1.352581  |

**Table S2g. Computationally-derived coordinates for the reactant of oxidized**

**Fe-sub-MnSOD<sub>cd</sub> and OOH**

|   |           |           |           |
|---|-----------|-----------|-----------|
| C | -4.371833 | 1.364220  | 2.65686   |
| N | -3.435752 | -0.044001 | 1.154136  |
| C | 7.803923  | -1.885898 | -0.049001 |
| C | 5.149390  | -0.917890 | 0.00522   |
| O | 3.837005  | -0.471835 | 0.02729   |
| C | -1.158055 | 2.518226  | -2.449261 |
| N | -0.307746 | 2.484456  | -1.349921 |
| N | -1.777243 | 0.844985  | -1.048907 |
| C | 2.928555  | 4.456746  | 0.30841   |
| C | 3.036345  | 2.983949  | 0.28969   |
| O | 3.664764  | 1.955805  | 0.72020   |
| C | -2.541227 | -3.211960 | -1.036375 |
| O | -1.996942 | -2.297996 | -1.790818 |
| O | -3.130357 | -2.779631 | 0.039005  |
| C | 0.927439  | -0.858749 | 1.91484   |
| C | -2.458036 | -4.665087 | -1.364455 |
| H | -1.560993 | -5.093163 | -0.899559 |
| H | -3.328711 | -5.193546 | -0.970583 |
| H | -2.381443 | -4.807736 | -2.444230 |
| C | -1.006199 | 3.498644  | -3.565109 |
| H | -1.103611 | 4.533314  | -3.213620 |
| H | -0.025478 | 3.409559  | -4.048043 |
| H | -1.772315 | 3.328598  | -4.326953 |
| C | -2.072549 | 1.502698  | -2.248224 |
| H | -2.909906 | 1.209137  | -2.855364 |
| C | -0.705135 | 1.480169  | -0.535954 |
| H | -0.201935 | 1.241177  | 0.38230   |
| C | -4.823414 | 2.521069  | 3.48451   |
| H | -5.915403 | 2.630402  | 3.47808   |
| H | -4.503984 | 2.427890  | 4.53033   |
| H | -4.396696 | 3.447460  | 3.09177   |

|    |           |           |           |
|----|-----------|-----------|-----------|
| C  | -3.548346 | 1.288173  | 1.55715   |
| H  | -3.039361 | 2.076020  | 1.03230   |
| C  | -4.179793 | -0.776973 | 1.985629  |
| H  | -4.316325 | -1.841740 | 1.914597  |
| C  | 1.871445  | -0.512195 | 3.018711  |
| H  | 2.486304  | -1.371057 | 3.31344   |
| H  | 2.551227  | 0.290651  | 2.70798   |
| H  | 1.319128  | -0.174645 | 3.90002   |
| C  | -0.449658 | -0.844620 | 1.832075  |
| H  | -1.171200 | -0.603558 | 2.591636  |
| C  | 0.296204  | -1.425043 | -0.152415 |
| H  | 0.341371  | -1.681689 | -1.195255 |
| C  | 3.819999  | 5.364452  | -0.50727  |
| H  | 4.272330  | 4.815186  | -1.33993  |
| H  | 3.255887  | 6.210165  | -0.92395  |
| H  | 4.630619  | 5.775689  | 0.10979   |
| C  | 9.229207  | -2.393517 | -0.103566 |
| H  | 9.826953  | -2.005306 | 0.72974   |
| H  | 9.265065  | -3.487599 | -0.059125 |
| H  | 9.733323  | -2.088151 | -1.031295 |
| C  | 7.521980  | -0.554665 | 0.30622   |
| H  | 8.340454  | 0.111765  | 0.56687   |
| C  | 6.720777  | -2.720116 | -0.371458 |
| H  | 6.908514  | -3.754974 | -0.646096 |
| C  | 5.405339  | -2.247677 | -0.349587 |
| H  | 4.575820  | -2.898290 | -0.606215 |
| C  | 6.214366  | -0.065288 | 0.33726   |
| H  | 6.001390  | 0.959903  | 0.62073   |
| N  | 2.039825  | 3.382940  | -0.45749  |
| H  | 0.602480  | 3.007544  | -1.13406  |
| N  | 1.373016  | -1.234136 | 0.64975   |
| N  | -0.836056 | -1.184420 | 0.531044  |
| H  | 2.369042  | -1.169726 | 0.34550   |
| H  | 2.437448  | 4.933168  | 1.15919   |
| H  | -5.376037 | -0.255755 | 3.650217  |
| N  | -4.759503 | 0.043559  | 2.91173   |
| O  | -3.998385 | -0.547662 | -1.484648 |
| H  | -4.041640 | -1.140757 | -2.267942 |
| H  | 3.734719  | 0.541508  | 0.22817   |
| Fe | -2.566823 | -0.875176 | -0.38896  |
| O  | -6.577958 | -0.305185 | -1.737623 |
| H  | -6.622173 | 0.532630  | -1.217499 |
| O  | -5.671577 | -1.129144 | -0.970408 |

**Table S2h. Computationally-derived coordinates for the transition state of oxidized Fe-sub-MnSOD<sub>cd</sub> and OOH**

|   |           |           |           |
|---|-----------|-----------|-----------|
| C | 4.358131  | 1.986399  | -2.070751 |
| N | 3.466320  | 0.197618  | -1.012087 |
| C | -7.625868 | -1.727157 | -0.180675 |
| C | -4.968620 | -0.766729 | -0.223490 |
| O | -3.655476 | -0.321517 | -0.240907 |
| C | 1.033807  | 1.977977  | 2.799490  |
| N | 0.408863  | 2.207227  | 1.574425  |
| N | 1.884578  | 0.586810  | 1.234324  |
| C | -2.574745 | 4.540614  | -0.055897 |
| C | -2.777551 | 3.083731  | -0.191611 |
| O | -3.456114 | 2.146890  | -0.735502 |
| C | 2.092809  | -3.340658 | 1.076558  |
| O | 2.005271  | -2.253878 | 1.810633  |
| O | 2.511844  | -3.159841 | -0.121560 |
| C | -0.688983 | -0.738152 | -2.057986 |
| C | 1.691167  | -4.673387 | 1.613086  |
| H | 0.598116  | -4.732420 | 1.679904  |
| H | 2.049221  | -5.467515 | 0.956462  |
| H | 2.091800  | -4.809854 | 2.621536  |
| C | 0.685068  | 2.731643  | 4.040006  |
| H | 0.884136  | 3.805107  | 3.932703  |
| H | -0.376246 | 2.620201  | 4.292714  |
| H | 1.273369  | 2.363311  | 4.885033  |
| C | 1.956449  | 0.977940  | 2.574834  |
| H | 2.669686  | 0.538351  | 3.243640  |
| C | 0.939572  | 1.367706  | 0.664152  |
| H | 0.620478  | 1.334172  | -0.360768 |
| C | 4.852107  | 3.327128  | -2.499956 |
| H | 5.938471  | 3.332182  | -2.654500 |
| H | 4.378964  | 3.661706  | -3.431953 |
| H | 4.625514  | 4.069491  | -1.730542 |
| C | 3.702523  | 1.572383  | -0.935542 |
| H | 3.408578  | 2.148694  | -0.079124 |
| C | 3.979831  | -0.228343 | -2.168001 |
| H | 4.043627  | -1.255511 | -2.476180 |
| C | -1.579265 | -0.369838 | -3.198551 |
| H | -2.187758 | -1.219542 | -3.530408 |
| H | -2.265409 | 0.434829  | -2.907964 |
| H | -0.986533 | -0.026618 | -4.050718 |

|    |           |           |           |
|----|-----------|-----------|-----------|
| C  | 0.684536  | -0.771114 | -1.926524 |
| H  | 1.434703  | -0.564928 | -2.666333 |
| C  | -0.155900 | -1.315467 | 0.030614  |
| H  | -0.252418 | -1.546828 | 1.075603  |
| C  | -3.434670 | 5.418592  | 0.823477  |
| H  | -3.941448 | 4.821128  | 1.588823  |
| H  | -2.834649 | 6.185605  | 1.331762  |
| H  | -4.202187 | 5.934101  | 0.230362  |
| C  | -9.052219 | -2.232312 | -0.133489 |
| H  | -9.657928 | -1.804181 | -0.941187 |
| H  | -9.092368 | -3.322907 | -0.228227 |
| H  | -9.544686 | -1.968286 | 0.812855  |
| C  | -7.345574 | -0.373097 | -0.438017 |
| C  | -8.166423 | 0.314377  | -0.626283 |
| C  | -6.539816 | -2.587461 | 0.049545  |
| H  | -6.726187 | -3.639938 | 0.246954  |
| C  | -5.222638 | -2.119163 | 0.032345  |
| H  | -4.391050 | -2.791508 | 0.216105  |
| C  | -6.036654 | 0.112756  | -0.462234 |
| H  | -5.826350 | 1.156601  | -0.669384 |
| N  | -1.781756 | 3.340100  | 0.617203  |
| H  | -0.460481 | 2.799942  | 1.319982  |
| N  | -1.193088 | -1.091591 | -0.810638 |
| N  | 1.007939  | -1.116905 | -0.612827 |
| H  | -2.200496 | -1.002366 | -0.540835 |
| H  | -2.027408 | 5.065764  | -0.840880 |
| H  | 4.994146  | 0.771829  | -3.724443 |
| N  | 4.513423  | 0.829594  | -2.840849 |
| O  | 4.062666  | -0.653177 | 1.831042  |
| H  | 3.925748  | -1.314774 | 2.540039  |
| H  | -3.551736 | 0.705524  | -0.374310 |
| Fe | 2.742310  | -1.022228 | 0.407743  |
| O  | 5.680896  | -1.190224 | 0.025871  |
| H  | 5.303017  | -0.823966 | 1.206343  |
| O  | 4.496811  | -1.941724 | -0.189985 |

**Table S2i. Computationally-derived coordinates for the product of reductive**

**Fe-sub-MnSOD<sub>cd</sub> and O<sub>2</sub>**

|   |           |           |           |
|---|-----------|-----------|-----------|
| C | 4.967181  | -2.336642 | -1.442255 |
| N | 3.776761  | -0.661691 | -0.469816 |
| C | -5.567353 | -1.920802 | -1.383067 |



|   |           |           |           |
|---|-----------|-----------|-----------|
| C | -3.684344 | -1.515455 | 0.680508  |
| O | -2.759016 | -1.378292 | 1.721485  |
| C | -0.329351 | -0.105736 | -2.623988 |
| N | -0.727986 | 1.086402  | -2.031124 |
| N | 1.128802  | 0.454591  | -0.984226 |
| C | -3.461034 | 2.830835  | 1.325101  |
| C | -2.390262 | 2.125755  | 1.880849  |
| O | -1.640376 | 1.137696  | 2.050661  |
| C | 3.185348  | 3.259975  | 0.258224  |
| O | 2.178619  | 3.679441  | 0.922429  |
| O | 3.466825  | 1.996531  | 0.062487  |
| C | 0.926671  | -2.816600 | 2.769088  |
| C | 4.137651  | 4.262434  | -0.355341 |
| H | 5.165649  | 4.040923  | -0.049028 |
| H | 4.096258  | 4.191091  | -1.448589 |
| H | 3.869832  | 5.273926  | -0.048518 |
| C | -1.100736 | -0.761830 | -3.721907 |
| H | -2.121877 | -1.005611 | -3.402717 |
| H | -1.178304 | -0.116994 | -4.606174 |
| H | -0.612712 | -1.692517 | -4.026670 |
| C | 0.828825  | -0.486988 | -1.974008 |
| H | 1.447112  | -1.352099 | -2.138760 |
| C | 0.170773  | 1.399139  | -1.063503 |
| H | 0.081850  | 2.269267  | -0.443814 |
| C | 5.510866  | -3.626712 | -1.959786 |
| H | 5.586726  | -3.631056 | -3.054803 |
| H | 6.508322  | -3.844638 | -1.556564 |
| H | 4.852207  | -4.450528 | -1.672576 |
| C | 3.844940  | -2.042848 | -0.703365 |
| H | 3.092132  | -2.710442 | -0.324469 |
| C | 4.846018  | -0.119883 | -1.063154 |
| H | 5.058715  | 0.933425  | -1.068672 |
| C | 0.856428  | -3.859561 | 3.834579  |
| H | 0.207247  | -3.550380 | 4.663376  |
| H | 0.470572  | -4.812484 | 3.450679  |
| H | 1.852312  | -4.044890 | 4.246193  |
| C | 1.990296  | -2.103676 | 2.253847  |
| H | 3.030895  | -2.158562 | 2.526594  |
| C | 0.209319  | -1.407659 | 1.184735  |
| H | -0.458975 | -0.881683 | 0.533358  |
| C | -4.678566 | 2.999587  | 0.544411  |
| H | -5.088904 | 4.007918  | 0.648792  |
| H | -4.401912 | 2.778026  | -0.512388 |
| H | -5.430505 | 2.260424  | 0.847712  |

|    |           |           |           |
|----|-----------|-----------|-----------|
| C  | -6.602496 | -2.121003 | -2.469122 |
| H  | -7.574436 | -1.694476 | -2.183708 |
| H  | -6.299900 | -1.636792 | -3.404062 |
| H  | -6.764754 | -3.184486 | -2.677880 |
| C  | -5.395136 | -2.871037 | -0.360785 |
| H  | -5.998070 | -3.775349 | -0.364521 |
| C  | -4.764722 | -0.768417 | -1.347441 |
| H  | -4.862145 | -0.010332 | -2.119546 |
| C  | -3.824021 | -0.557830 | -0.332640 |
| H  | -3.217627 | 0.342390  | -0.371445 |
| C  | -4.467510 | -2.674518 | 0.665145  |
| H  | -4.345078 | -3.404160 | 1.458375  |
| N  | -2.662411 | 3.448505  | 2.255616  |
| H  | -2.169501 | 4.138405  | -1.134377 |
| N  | -0.189044 | -2.358241 | 2.073548  |
| N  | 1.530233  | -1.218763 | 1.267904  |
| H  | -1.177209 | -2.546676 | 2.222155  |
| H  | -1.670908 | 1.611393  | -2.116523 |
| H  | 6.441640  | -0.957776 | -2.174305 |
| N  | 5.588964  | -1.103729 | -1.658529 |
| H  | 1.490087  | 2.454298  | 1.562641  |
| O  | 1.300109  | 1.461918  | 1.727652  |
| H  | 0.383186  | 1.261231  | 2.011072  |
| H  | -2.397934 | -0.453756 | 1.810451  |
| O  | -2.147722 | 3.238967  | -0.741938 |
| O  | -2.956292 | 2.430991  | -1.778521 |
| Fe | 2.393420  | 0.369318  | 0.479011  |

**Table S2j. Computationally-derived coordinates for the reactant of reductive**

**Fe-sub-MnSOD<sub>cd</sub> and OOH**

|   |           |           |           |
|---|-----------|-----------|-----------|
| C | -5.307698 | -2.750461 | 0.229226  |
| N | -4.064630 | -0.972677 | -0.443016 |
| C | 7.306844  | -1.111443 | -1.897400 |
| C | 4.624393  | -1.174946 | -1.005332 |
| O | 3.302407  | -1.187541 | -0.593399 |
| C | -0.880855 | 1.070684  | 3.030961  |
| N | -0.561271 | -0.238296 | 2.698587  |
| N | -2.024254 | 0.452260  | 1.166377  |
| C | 2.137685  | -3.161522 | 3.865331  |
| C | 2.338457  | -2.613383 | 2.507503  |
| O | 2.957937  | -2.723057 | 1.395545  |

|   |           |           |           |
|---|-----------|-----------|-----------|
| C | -2.765134 | 2.191112  | -2.457358 |
| O | -2.146648 | 2.413960  | -1.325964 |
| O | -3.505157 | 1.131273  | -2.522762 |
| C | 0.102217  | -2.121959 | -1.740942 |
| C | -2.590777 | 3.106319  | -3.629243 |
| H | -3.426573 | 3.001773  | -4.323720 |
| H | -2.499207 | 4.142878  | -3.294826 |
| H | -1.666301 | 2.846036  | -4.159754 |
| C | -0.275485 | 1.781872  | 4.196146  |
| H | -0.558865 | 1.317862  | 5.149211  |
| H | 0.819642  | 1.772416  | 4.143418  |
| H | -0.603060 | 2.825338  | 4.219392  |
| C | -1.794094 | 1.487941  | 2.080861  |
| H | -2.247598 | 2.458690  | 1.971381  |
| C | -1.260885 | -0.574589 | 1.586575  |
| H | -1.152052 | -1.518702 | 1.083296  |
| C | -5.940622 | -3.897732 | 0.944208  |
| H | -7.015023 | -3.740848 | 1.105193  |
| H | -5.820577 | -4.840608 | 0.395389  |
| H | -5.475563 | -4.027157 | 1.924884  |
| C | -4.300401 | -1.885475 | 0.592422  |
| H | -3.733476 | -1.855780 | 1.505896  |
| C | -4.919597 | -1.273415 | -1.426415 |
| H | -4.992842 | -0.743286 | -2.360002 |
| C | 0.802588  | -3.423383 | -1.956220 |
| H | 1.389863  | -3.423592 | -2.882769 |
| H | 1.492182  | -3.634369 | -1.129722 |
| H | 0.078513  | -4.240796 | -2.016946 |
| C | -1.234426 | -1.787326 | -1.663404 |
| H | -2.097649 | -2.417130 | -1.785003 |
| C | -0.104698 | 0.054826  | -1.286658 |
| H | 0.149806  | 1.070455  | -1.042478 |
| C | 3.090772  | -2.906723 | 5.010510  |
| H | 3.701157  | -2.018564 | 4.814473  |
| H | 2.550168  | -2.746862 | 5.953682  |
| H | 3.767833  | -3.759873 | 5.154641  |
| C | 8.749098  | -1.057784 | -2.354849 |
| H | 9.223194  | -2.045469 | -2.307956 |
| H | 8.827394  | -0.698539 | -3.386965 |
| H | 9.349241  | -0.382506 | -1.728538 |
| C | 6.922022  | -1.907264 | -0.803633 |
| H | 7.669743  | -2.510834 | -0.294865 |
| C | 6.311475  | -0.352959 | -2.535634 |
| H | 6.578212  | 0.267892  | -3.387218 |

|    |           |           |           |
|----|-----------|-----------|-----------|
| C  | 4.984002  | -0.377341 | -2.098852 |
| H  | 4.223108  | 0.214842  | -2.596475 |
| C  | 5.600451  | -1.946822 | -0.354004 |
| H  | 5.307923  | -2.569252 | 0.484870  |
| N  | 1.447401  | -1.915253 | 3.164221  |
| H  | 0.232925  | -0.868602 | 3.062795  |
| N  | 0.796824  | -0.939318 | -1.508299 |
| N  | -1.355678 | -0.426513 | -1.361136 |
| H  | 1.820178  | -0.892870 | -1.334659 |
| H  | 1.492091  | -4.033520 | 3.986788  |
| H  | -6.408289 | -2.770568 | -1.613913 |
| N  | -5.686809 | -2.346435 | -1.053438 |
| O  | -4.296810 | 1.833556  | 0.163955  |
| H  | -4.557143 | 1.714949  | 1.093659  |
| H  | 3.129678  | -1.753295 | 0.258225  |
| O  | 2.647112  | 12.237554 | 1.338648  |
| H  | 3.577043  | 11.902102 | 1.264317  |
| O  | 1.823914  | 11.136249 | 1.110008  |
| H  | -3.985753 | 2.742129  | -0.016099 |
| Fe | -2.878270 | 0.575922  | -0.618604 |

**Table S2k. Computationally-derived coordinates for the transition state of reductive Fe-sub-MnSOD<sub>cd</sub> and OOH**

|   |           |           |           |
|---|-----------|-----------|-----------|
| C | 4.157426  | 2.131253  | -2.772036 |
| N | 3.403239  | 0.433530  | -1.483240 |
| C | -7.630128 | -2.012237 | -0.352254 |
| C | -5.008771 | -0.978185 | -0.155148 |
| O | -3.709143 | -0.498726 | -0.062077 |
| C | 1.078027  | 1.617645  | 2.907499  |
| N | 0.377286  | 2.109506  | 1.805233  |
| N | 1.878885  | 0.693652  | 1.015758  |
| C | -2.896400 | 4.392514  | 0.710591  |
| C | -2.978817 | 2.949857  | 0.404306  |
| O | -3.603126 | 2.025218  | -0.222889 |
| C | 2.923707  | -3.060380 | 0.287877  |
| O | 2.243449  | -2.298148 | 1.093978  |
| O | 3.321790  | -2.459079 | -0.808720 |
| C | -0.929973 | -0.319207 | -2.115674 |
| C | 3.284325  | -4.458026 | 0.621202  |
| H | 3.633144  | -4.995401 | -0.261371 |

|   |           |           |           |
|---|-----------|-----------|-----------|
| H | 4.085844  | -4.401969 | 1.370418  |
| H | 2.435393  | -4.976622 | 1.075037  |
| C | 0.775320  | 2.033922  | 4.308601  |
| H | 0.955192  | 3.105163  | 4.461987  |
| H | -0.271757 | 1.837164  | 4.568672  |
| H | 1.408622  | 1.482544  | 5.008399  |
| C | 2.014770  | 0.734161  | 2.410704  |
| H | 2.753340  | 0.125219  | 2.920552  |
| C | 0.881930  | 1.541853  | 0.691244  |
| H | 0.476176  | 1.696845  | -0.292738 |
| C | 4.518675  | 3.438568  | -3.393981 |
| H | 5.604784  | 3.559693  | -3.489354 |
| H | 4.079535  | 3.552355  | -4.392879 |
| H | 4.148393  | 4.259440  | -2.775114 |
| C | 3.471254  | 1.822356  | -1.619559 |
| H | 3.032633  | 2.480305  | -0.890807 |
| C | 4.037717  | -0.106017 | -2.529344 |
| H | 4.167805  | -1.162080 | -2.694287 |
| C | -1.955573 | 0.253971  | -3.036704 |
| H | -2.595508 | -0.525678 | -3.466102 |
| H | -2.604318 | 0.957361  | -2.500224 |
| H | -1.473231 | 0.786760  | -3.860775 |
| C | 0.447286  | -0.278384 | -2.121818 |
| H | 1.106707  | 0.161141  | -2.847567 |
| C | -0.150832 | -1.353367 | -0.293966 |
| H | -0.116532 | -1.852964 | 0.657242  |
| C | -3.777647 | 5.075348  | 1.730585  |
| H | -4.193906 | 4.345616  | 2.433248  |
| H | -3.216001 | 5.822028  | 2.308209  |
| H | -4.614426 | 5.592266  | 1.241334  |
| C | -9.037969 | -2.563952 | -0.426141 |
| H | -9.686845 | -1.925796 | -1.036643 |
| H | -9.051912 | -3.569653 | -0.861197 |
| H | -9.497882 | -2.634843 | 0.569688  |
| C | -7.388699 | -0.628229 | -0.400951 |
| H | -8.226341 | 0.054397  | -0.519370 |
| C | -6.522669 | -2.865167 | -0.207612 |
| H | -6.678449 | -3.940296 | -0.171275 |
| C | -5.223462 | -2.360718 | -0.106095 |
| H | -4.375407 | -3.027004 | 0.012837  |
| C | -6.096712 | -0.105096 | -0.305235 |
| H | -5.915269 | 0.963323  | -0.352862 |
| N | -1.965221 | 3.197612  | 1.192668  |
| H | -0.536341 | 2.673660  | 1.744190  |

|    |           |           |           |
|----|-----------|-----------|-----------|
| N  | -1.278805 | -1.006409 | -0.954406 |
| N  | 0.927832  | -0.916171 | -0.971701 |
| H  | -2.257787 | -1.049054 | -0.585096 |
| H  | -2.440457 | 5.057119  | -0.025764 |
| H  | 5.026426  | 0.763780  | -4.182898 |
| N  | 4.504462  | 0.895779  | -3.330558 |
| O  | 4.300756  | -0.579577 | 0.882654  |
| H  | 4.972859  | 0.031270  | 0.538497  |
| H  | -3.638390 | 0.536133  | -0.034079 |
| Fe | 2.671505  | -0.722257 | -0.069704 |
| O  | 4.505620  | -2.648470 | 3.067672  |
| H  | 3.679533  | -2.788567 | 3.578160  |
| O  | 4.568362  | -1.118309 | 3.094002  |
| H  | 4.453126  | -0.865619 | 1.874441  |

**Table S2l. Computationally-derived coordinates for the product of oxidized Fe-sub-MnSOD<sub>cd</sub> and H<sub>2</sub>O<sub>2</sub>**

|   |           |           |           |
|---|-----------|-----------|-----------|
| C | -4.456163 | -3.887413 | -0.807252 |
| N | -3.614042 | -1.790105 | -0.874831 |
| C | 7.606675  | 0.728110  | -1.880230 |
| C | 4.983565  | 0.161501  | -0.997713 |
| O | 3.683522  | -0.105098 | -0.590803 |
| C | -1.841029 | -1.169770 | 3.295626  |
| N | -0.628544 | -0.675188 | 2.831372  |
| N | -2.069508 | -0.450109 | 1.159360  |
| C | 3.172381  | -1.482393 | 4.234812  |
| C | 3.067628  | -1.257320 | 2.777586  |
| O | 3.656419  | -1.316460 | 1.645119  |
| C | -2.724130 | 1.828367  | -2.163174 |
| O | -2.031995 | 1.832481  | -1.059721 |
| O | -3.313645 | 0.704581  | -2.448149 |
| C | 0.895393  | -2.021493 | -1.405363 |
| C | -2.856924 | 3.039235  | -3.022139 |
| H | -2.969449 | 2.752796  | -4.070253 |
| H | -3.754512 | 3.592993  | -2.720086 |
| H | -1.993303 | 3.695271  | -2.894857 |
| C | -2.018271 | -1.724462 | 4.670546  |
| H | -1.319549 | -2.546812 | 4.866091  |
| H | -1.844501 | -0.960428 | 5.437974  |
| H | -3.035208 | -2.105517 | 4.801484  |
| C | -2.734837 | -1.018178 | 2.252651  |

|   |           |           |           |
|---|-----------|-----------|-----------|
| H | -3.778340 | -1.281351 | 2.213896  |
| C | -0.803291 | -0.246401 | 1.562492  |
| H | -0.012444 | 0.173726  | 0.971382  |
| C | -4.805630 | -5.308804 | -0.517388 |
| H | -5.865033 | -5.425278 | -0.256295 |
| H | -4.598179 | -5.964915 | -1.372170 |
| H | -4.215817 | -5.672377 | 0.327833  |
| C | -3.559712 | -3.024035 | -0.220970 |
| H | -2.901016 | -3.191609 | 0.612260  |
| C | -4.527378 | -1.888829 | -1.843315 |
| H | -4.792894 | -1.092585 | -2.516945 |
| C | 1.910364  | -3.113231 | -1.323444 |
| H | 2.528567  | -3.164993 | -2.227609 |
| H | 2.581849  | -2.950739 | -0.471330 |
| H | 1.418790  | -4.081351 | -1.194140 |
| C | -0.480229 | -2.027563 | -1.335432 |
| H | -1.144106 | -2.868218 | -1.251899 |
| C | 0.130669  | 0.076354  | -1.488038 |
| H | 0.110746  | 1.150714  | -1.496120 |
| C | 3.867769  | -0.525161 | 5.174936  |
| H | 3.951796  | 0.469056  | 4.723255  |
| H | 3.318852  | -0.423357 | 6.121145  |
| H | 4.880585  | -0.877778 | 5.413179  |
| C | 9.013029  | 1.053728  | -2.336424 |
| H | 9.697581  | 0.215179  | -2.160829 |
| H | 9.040887  | 1.289335  | -3.405894 |
| H | 9.422203  | 1.921353  | -1.800093 |
| C | 7.376525  | 0.054869  | -0.666963 |
| H | 8.223916  | -0.254308 | -0.060059 |
| C | 6.488047  | 1.105032  | -2.641380 |
| H | 6.635596  | 1.623492  | -3.585218 |
| C | 5.186848  | 0.830255  | -2.210055 |
| H | 4.329250  | 1.131213  | -2.802739 |
| C | 6.084664  | -0.231305 | -0.220726 |
| H | 5.911035  | -0.756879 | 0.712086  |
| N | 1.946800  | -0.948005 | 3.376673  |
| H | 0.371250  | -0.745804 | 3.241444  |
| N | 1.256513  | -0.680931 | -1.506252 |
| N | -0.954505 | -0.711384 | -1.367749 |
| H | 2.232777  | -0.338785 | -1.383081 |
| H | 3.052062  | -2.498813 | 4.614516  |
| H | -5.767103 | -3.482895 | -2.461654 |
| N | -5.055805 | -3.146017 | -1.832387 |
| O | -4.247175 | 0.728209  | 0.002764  |

|    |           |           |           |
|----|-----------|-----------|-----------|
| H  | -4.473966 | 0.503873  | 0.926826  |
| H  | 3.618107  | -0.537214 | 0.343176  |
| O  | -2.928689 | 11.339116 | 1.974056  |
| H  | -2.654194 | 10.607993 | 2.572112  |
| O  | -2.594095 | 10.658858 | 0.643653  |
| H  | -2.835574 | 11.402008 | 0.046253  |
| Fe | -2.737982 | -0.035957 | -0.653237 |



#### 4. The chemical models of MnSOD<sub>cd</sub> and Fe-sub-MnSOD<sub>cd</sub>

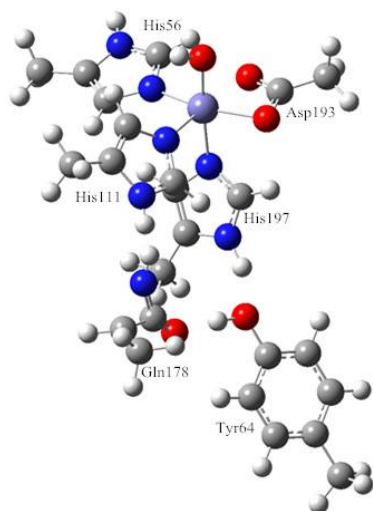

The oxidative Fe-sub-MnSOD<sub>cd</sub>

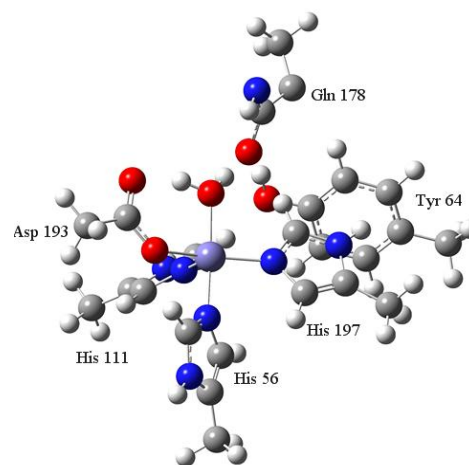

The reductive Fe-sub-MnSOD<sub>cd</sub>

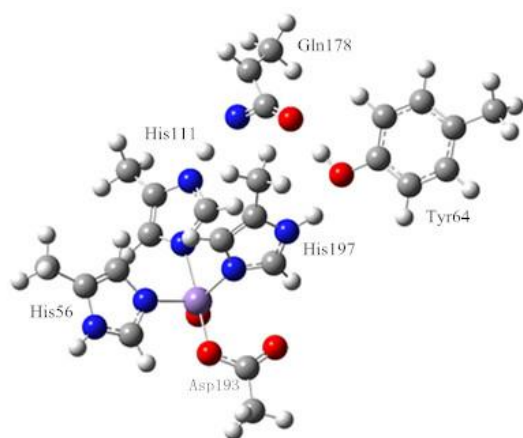

The oxidative MnSOD<sub>cd</sub>

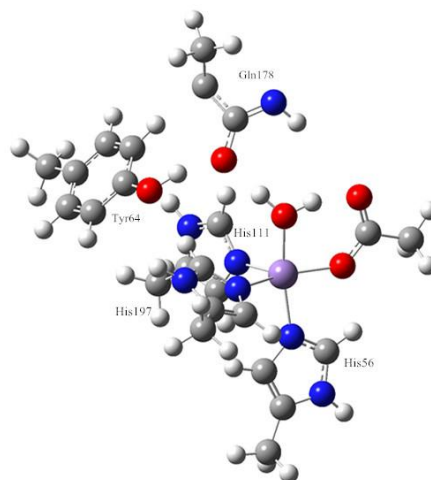

The reductive MnSOD<sub>cd</sub>

Fig. S2. The chemical models of MnSOD<sub>cd</sub> and Fe-sub-MnSOD<sub>cd</sub>

**5. The chemical configurations for the reactants, products and transition states in MnSOD<sub>cd</sub> and Fe-sub-MnSOD<sub>cd</sub>**

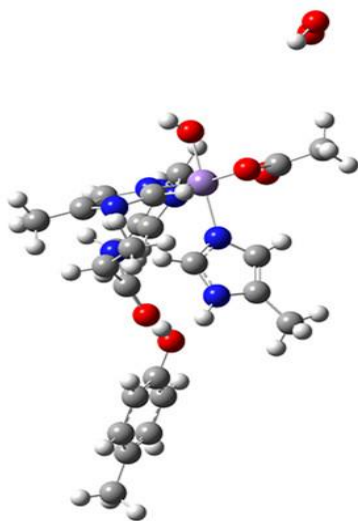

**The reactant of oxidized MnSOD<sub>cd</sub> and OOH**

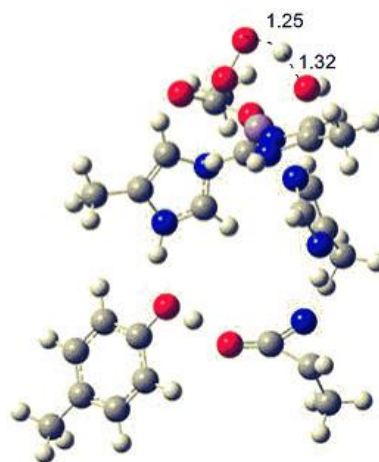

**The transition state of oxidized MnSOD<sub>cd</sub> and OOH**

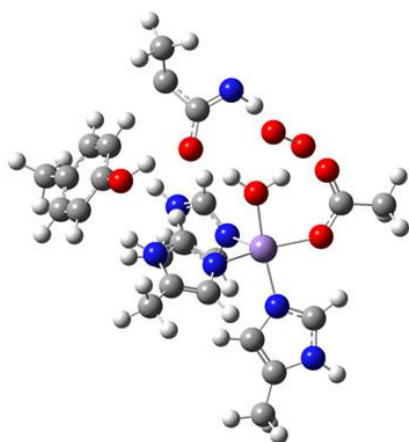

**The product of reductive MnSOD<sub>cd</sub> and O<sub>2</sub>**

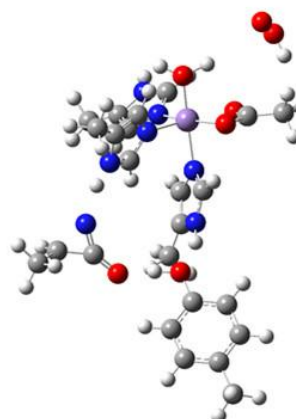

**The reactant of reductive MnSOD<sub>cd</sub> and OOH**

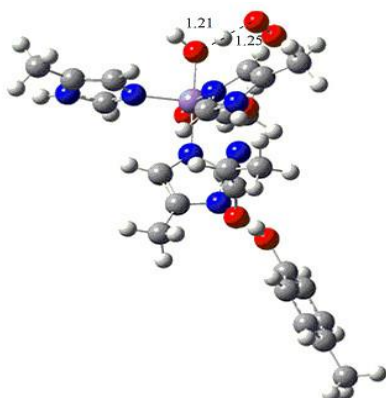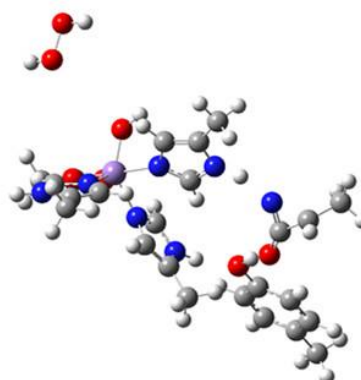

The transition state of reductive MnSOD<sub>cd</sub> and OOH

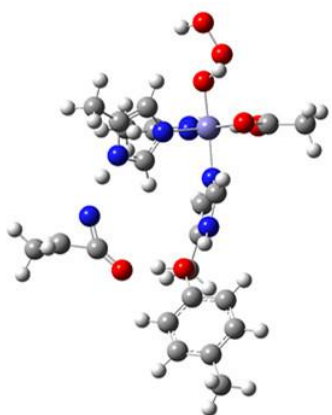

The product of oxidized MnSOD<sub>cd</sub> and H<sub>2</sub>O<sub>2</sub>

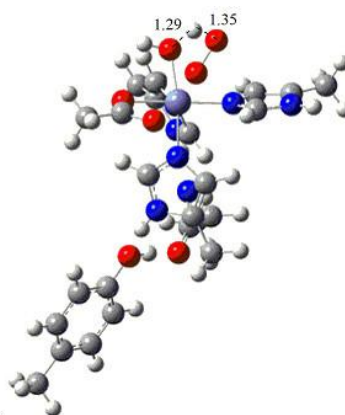

The reactant of oxidized Fe-sub-MnSOD<sub>cd</sub> and OOH

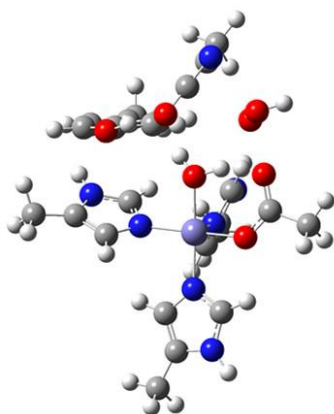

The transition state of oxidized Fe-sub-MnSOD<sub>cd</sub> and OOH

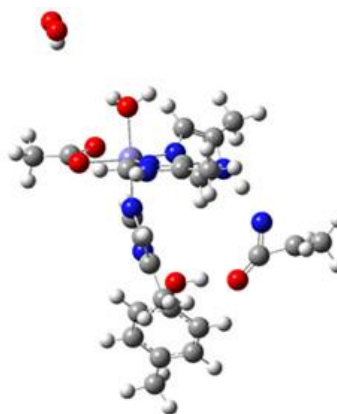

The product of reductive Fe-sub-MnSOD<sub>cd</sub> and O<sub>2</sub>

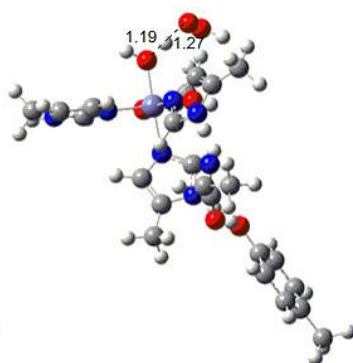

The reactant of reductive Fe-sub-MnSOD<sub>cd</sub> and OOH

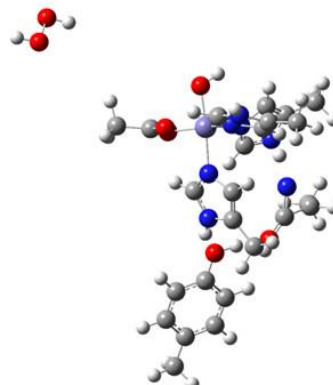

The transition state of reductive Fe-sub-MnSOD<sub>cd</sub> and OOH

The product of oxidized Fe-sub-MnSOD<sub>cd</sub> and H<sub>2</sub>O<sub>2</sub>

**Fig. S3.** The configurations of the reactants, products and transition states

## 6. The HUMO and LUMO energy gap between $\cdot\text{OOH}$ and $\text{MnSOD}_{\text{cd}}$

### /Fe-sub- $\text{MnSOD}_{\text{cd}}$

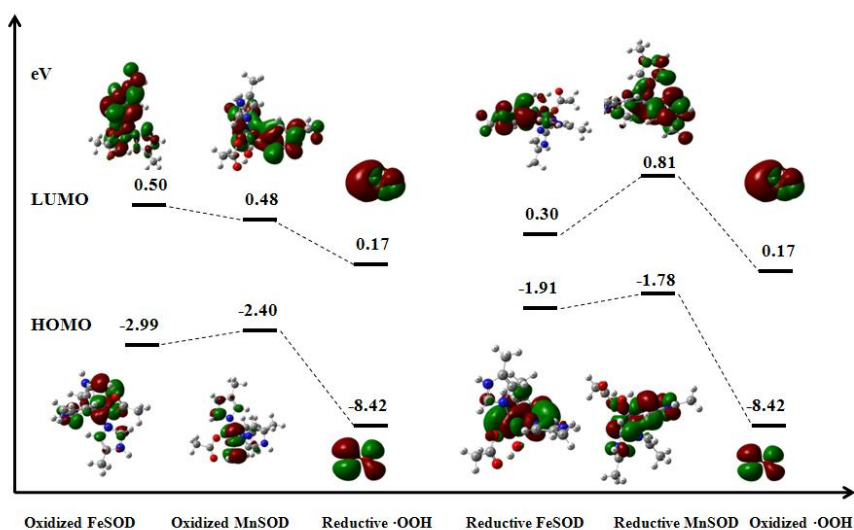

**Fig. S4.** The frontier molecular orbitals of Fe-sub- $\text{MnSOD}_{\text{cd}}$ ,  $\text{MnSOD}_{\text{cd}}$  and  $\cdot\text{OOH}$ . Solid values are orbital energies (in eV). According to symmetry principle, for the two pairs of frontier molecular orbital interactions between the reactants ( $\text{LUMO}_{\text{Fe-sub-MnSOD}}$  with  $\text{HOMO}_{\text{OOH}}$  and  $\text{LUMO}_{\text{MnSOD}}$  with  $\text{HOMO}_{\text{OOH}}$ ), the order of the LUMO orbital energies in the oxidized states is:  $\text{Fe-sub-MnSOD}_{\text{cd}} > \text{MnSOD}_{\text{cd}}$ . Therefore, the gap between  $\text{HOMO}_{\text{OOH}}$  and  $\text{LUMO}_{\text{Fe-sub-MnSOD}}$  is bigger than the corresponding gap between  $\text{HOMO}_{\text{OOH}}$  and  $\text{LUMO}_{\text{MnSOD}}$ . Meanwhile, the order of the HOMO orbital energies of the reductive states is:  $\text{Fe-sub-MnSOD}_{\text{cd}} < \text{MnSOD}_{\text{cd}}$ . Therefore, the gap between  $\text{LUMO}_{\text{OOH}}$  and  $\text{HOMO}_{\text{Fe-sub-MnSOD}}$  is also bigger than the corresponding gap between  $\text{LUMO}_{\text{OOH}}$  and  $\text{HOMO}_{\text{MnSOD}}$ . Thus the results indicated

that the catalytic activity of MnSOD<sub>cd</sub> was stronger than that of Fe-sub-MnSOD<sub>cd</sub> during the whole catalytic process.

## **Reference**

1. Li, W., Wang, H., Chen, Z., Ye, Q., Tian, Y., Xu, X., Huang, Z., Li, P., and Tan, X. (2014) Probing the metal specificity mechanism of superoxide dismutase from human pathogen *Clostridium difficile*, *Chem Commun* 50, 584-586.
